# Supplementary material for: Dissecting the Molecular Response of Human Escs to Iron-Mediated Oxidative Stress by Genetic Silencing of FTH1 Gene
Source: Research Square preprint supplement (doi:10.21203/rs.3.rs-741242/v1), 2021-07-28
Supplement: Supplementary file 1 [file f3e8ebf51a27fdd81997069d.docx]

Supplementary Table 1

List of primers used for qRT-PCR experiments

| **Gene** | **Description** | **Forward (5′→3′)** | **Reverse (5′→3′)** |
| --- | --- | --- | --- |
| *GAPDH* | Glyceraldehyde-3-Phosphate Dehydrogenase | TCCTCTGACTTCAACAGCGA | GGGTCTTACTCCTTGGAGGC |
| *NANOG* | Nanog Homeobox | TGCAAGAACTCTCCAACATCCT | ATTGCTATTCTTCGGCCAGTT |
| *OCT4* | POU Class 5 Homeobox 1 | GGAGGAAGCTGACAACAATGAA | GGCCTGCACGAGGGTTT |
| *SOX2* | SRY-Box Transcription Factor 2 | GGGAAATGGGAGGGGTGCAAAAGAGG | TTGCGTGAGTGTGGATGGGATTGGTG |
| *AFP* | Alpha Fetoprotein | GTGCCAAGCTCAGGGTGTAG | CAGCCTCAAGTTGTTCCTCTG |
| *NKX2.5* | NK2 Homeobox 5 | ACCCTGAGTCCCCTGGATTT | TCACTCATTGCACGCTGCAT |
| *PAX6* | Paired Box 6 | CAGCTTCACCATGGCAAATAA | ATCATAACTCCGCCCATTCA |
| *GATA4* | GATA Binding Protein 4 | GGCCTGTCATCTCACTACGG | ATGGCCAGACATCGCACT |
| *FOXA2* | Forkhead Box A2 | CCGACTGGAGCAGCTACTATG | TGTACGTGTTCATGCCGTTC |
| *HAND1* | Heart And Neural Crest Derivatives Expressed 1 | CCAGCTACATCGCCTACCTG | CCGGTGCGTCCTTTAATCCT |
| *CD31* | Platelet And Endothelial Cell Adhesion Molecule 1 | ATGCCGTGGAAAGCAGATAC | CTGTTCTTCTCGGAACATGGA |
| *NESTIN* | Nestin | CAGCGTTGGAACAGAGGTTGG | TGGCACAGGTGTCTCAAGGGTAG |
| *NRF2* | Nuclear Factor, Erythroid 2 Like 2 | CATCCAGTCAGAAACCAGTGG | AATGAAGACTGGGCTCTCGA |
| *GPX2* | Glutathione Peroxidase 2 | GGCTTCCCTTGCAACCAATT | GGGTCATCATAAGGGTAGGGG |
| *GPX3* | Glutathione Peroxidase 3 | GGCTTTCCCTGCAACCAATT | AAGAGGCGGTCAGATGTACC |
| *SOD1* | Superoxide Dismutase 1 | GGAGACTTGGGCAATGTGAC | CACAAGCCAAACGACTTCCA |
| *SOD2* | Superoxide Dismutase 2 | CACTAGCAGCATGTTGAGCC | CCTGGTACTTCTCCTCGGTG |
| *HMOX1* | Heme Oxygenase 1 | TGCTGACCCATGACACCAAG | AAGCCCTACAGCAACTGTCG |
| *NQO-1* | NAD(P)H Quinone Dehydrogenase 1 | ATCCTGCCGAGTCTGTTCTG | TTTCAGAATGGCAGGGACTC |
| *HIF1A* | Hypoxia Inducible Factor 1 Subunit Alpha | GCCAGATCTCGGCGAAGTAA | ACCATAACAAAACCATCCAAGGC |
| *HIF2A* | Hypoxia-Inducible Factor 2 Alpha | CAGTGTGAGCTCCCATCTGG | GCTCCACCTGTGTAAGTCCC |
| *BIM* | BCL2 Like 11 | GCTGTCTCGATCCTCCAGTG | TCCAATACGCCGCAACTCTT |
| *BAX* | BCL2 Associated X, Apoptosis Regulator | GGACGAACTGGACAGTAACATGG | GCAAAGTAGAAAAGGGCGACAAC |
| *CASP9* | Caspase 9 | GAGGGAGTCAGGCTCTTCCT | GTCCACTGGTCTGGGTGTTT |
| *CASP3* | Caspase 3 | CCTCTTCCCCCATTCTCATT | TCCAGGGATATTCCAGAGTCC |
| *BRCA1* | BRCA1 DNA Repair Associated | CTCAAGGAACCAGGGATGAA | CGCTTCTCAGTGGTGTTCAA |
| *DMC1* | DNA Meiotic Recombinase 1 | AGGGGCTTCACCTTGAAAAT | TGTCAGCCACGTTAATTCCA |
| *PCNA* | Proliferating Cell Nuclear Antigen | AAGCACCAAACCAGGAGAAA | TCACTCCGTCTTTTGCACAG |
| *POLQ* | DNA Polymerase Theta | GGTCTGATCAATCGCCTCAT | AGCAGATACCCTCGGTGAGA |
| *ALDOA* | Aldolase, Fructose-Bisphosphate A | AAGGAGCTGTCTGACATCGC | TTCTCGGTGCCAATGGACTG |
| *PGK1* | Phosphoglycerate Kinase 1 | GGATTAAGGCTGCTGTCCCA | TTCTGGGCCTACACAGTCCT |
| *ENO1* | Enolase 1 | CCTAGAGCTCCGGGACAATG | GGCGTTCGCACCAAACTTAG |
| *PKM* | Pyruvate Kinase M1/2 | ATTCACCACCCATCACAGCC | CTTGATGGTCTCCGCATGGT |
| *G6PC* | Glucose-6-Phosphatase Catalytic Subunit 1 | CACTTCCGTGCCCCTGATAA | CCGAAATCTGTAGGTCGGCT |
| *FBP1* | Fructose-Bisphosphatase 1 | CTTTGCCACGTGTGTTCTCG | ACGGACACAAGGCAATCGATG |
| *G6PD* | Glucose-6-Phosphate Dehydrogenase | AGGCCGTCACCAAGAACATT | CGATGCGGTAGATCTGGTCC |
| *PGD* | Phosphogluconate Dehydrogenase | GCTCTTCGGTTCTGCTCTGT | TAAGTTCTGGCCCATGACGG |
| *PDK1* | Pyruvate Dehydrogenase Kinase 1 | CCTAGAGGGTTACGGGACAG | TTCCGATGTCCCAAGTGTGT |
| *UCP2* | Uncoupling Protein 2 | CACAGATGTGCCCCCTACTG | CAGTACGCACCATGGTCAGA |
| *FTH1* | Ferritin Heavy Chain 1 | CATCAACCGCCAGATAAC | GATGGCTTTCACCTGCTCAT |
